# Supplementary material
Source: MDPI journal article supplement (https://www.mdpi.com/2225-1154/11/3/51)
Supplement: s1 [file s1]

Supplementary:

**Projected mean annual and monthly precipitation and temperature for bias corrected future scenarios.**

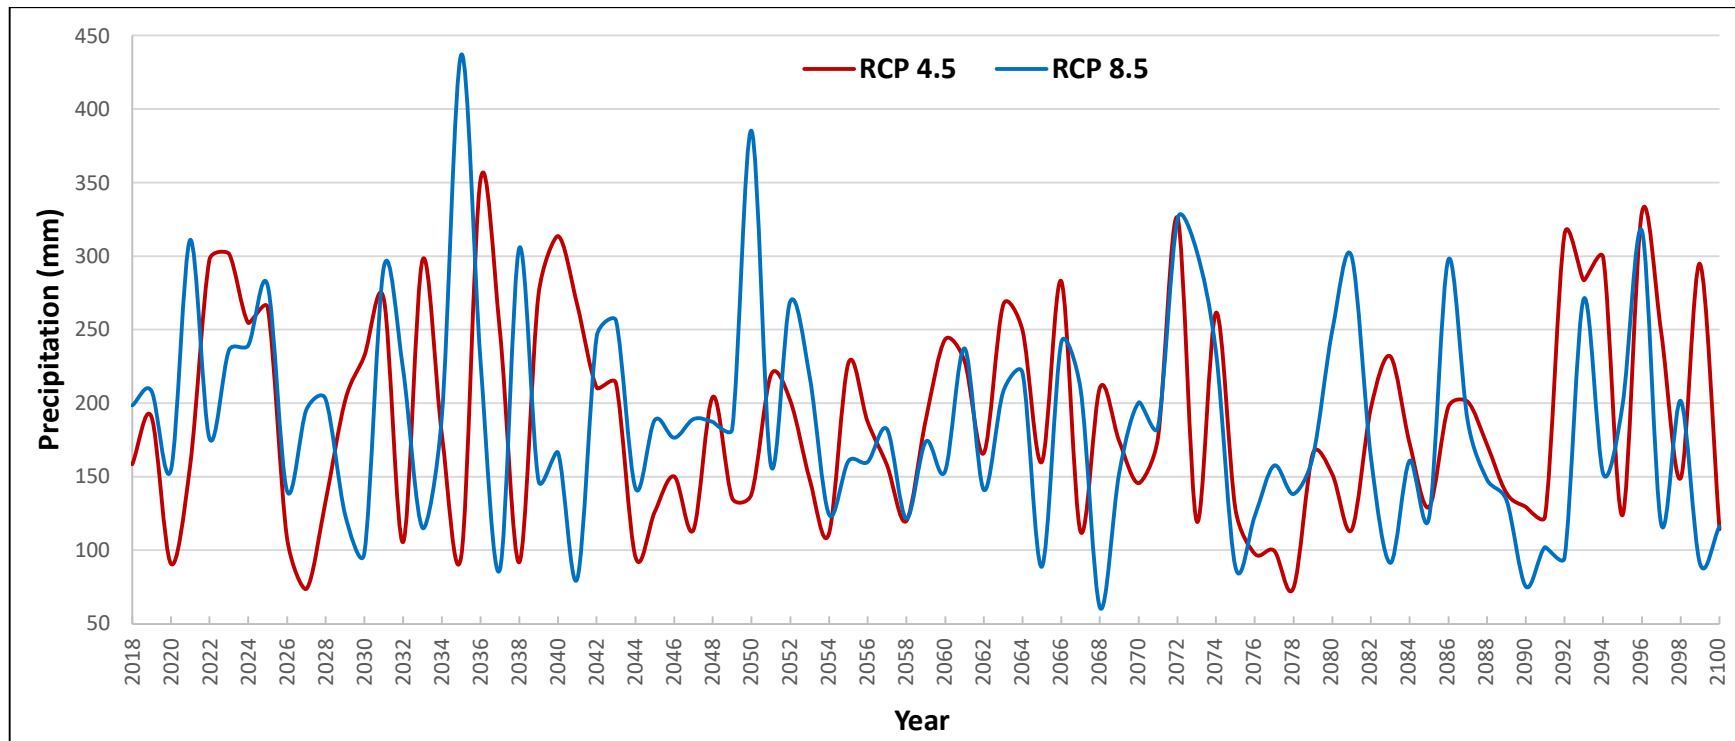

Figure S1: Future mean annual precipitation scenarios using linear scaling bias correction.

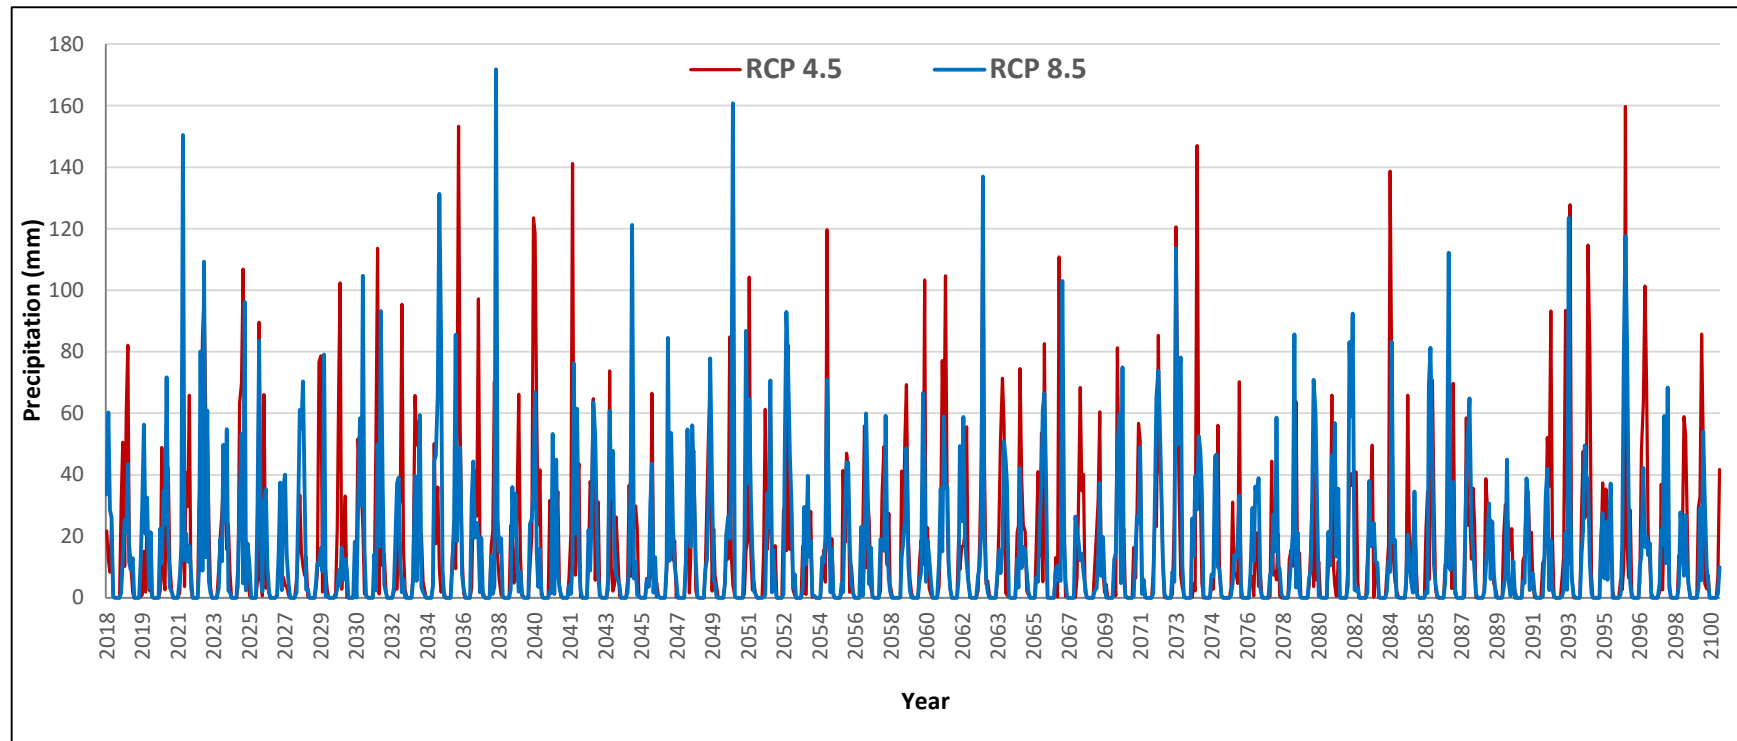

Figure S2: Future mean monthly precipitation scenarios using linear scaling bias correction.

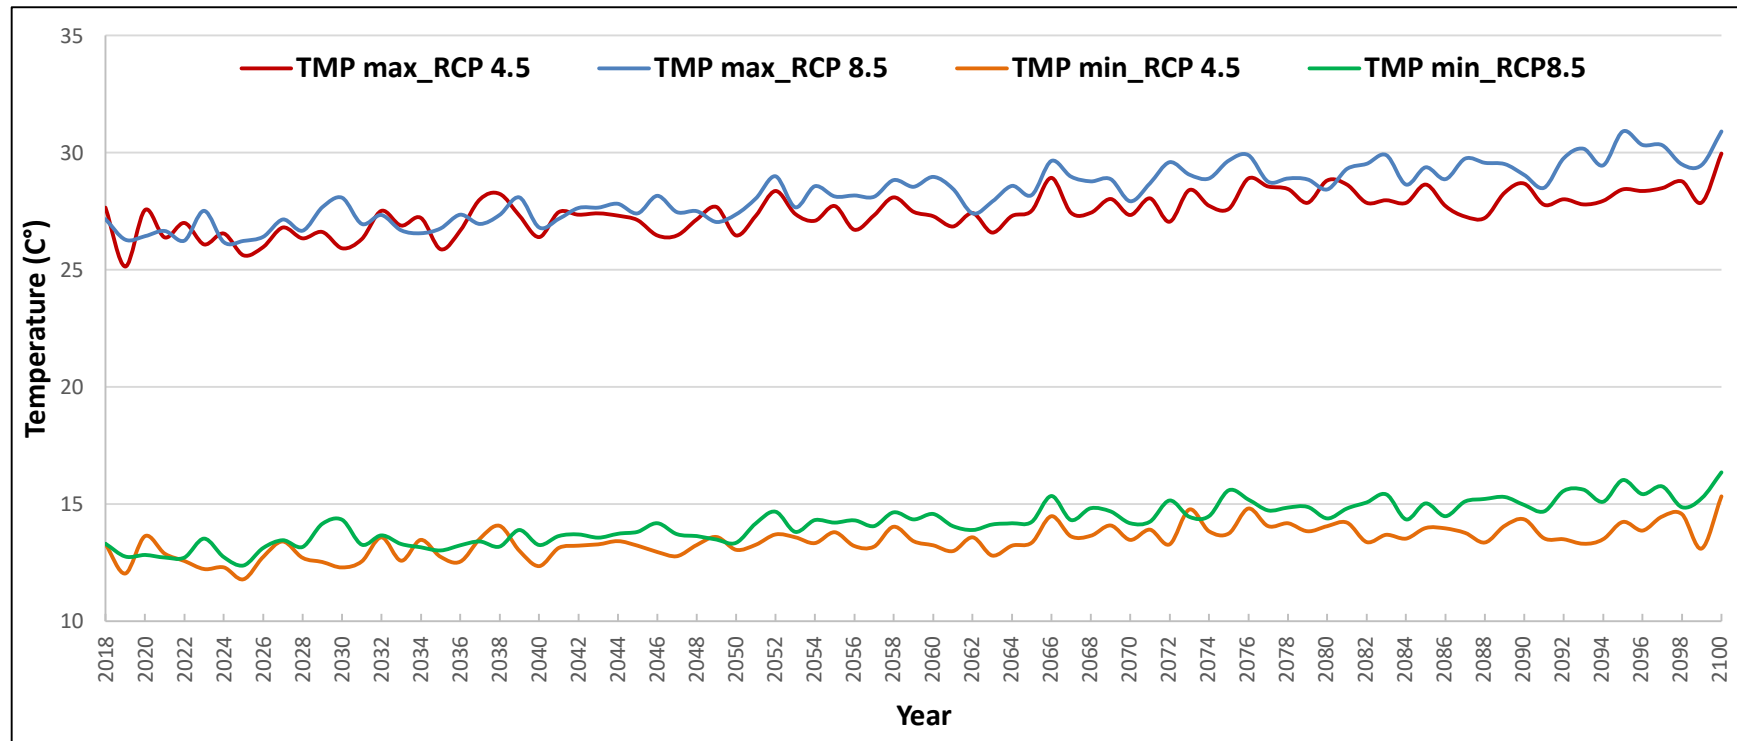

Figure S3: Future mean annual maximum and minimum temperature scenarios using variance scaling bias correction.

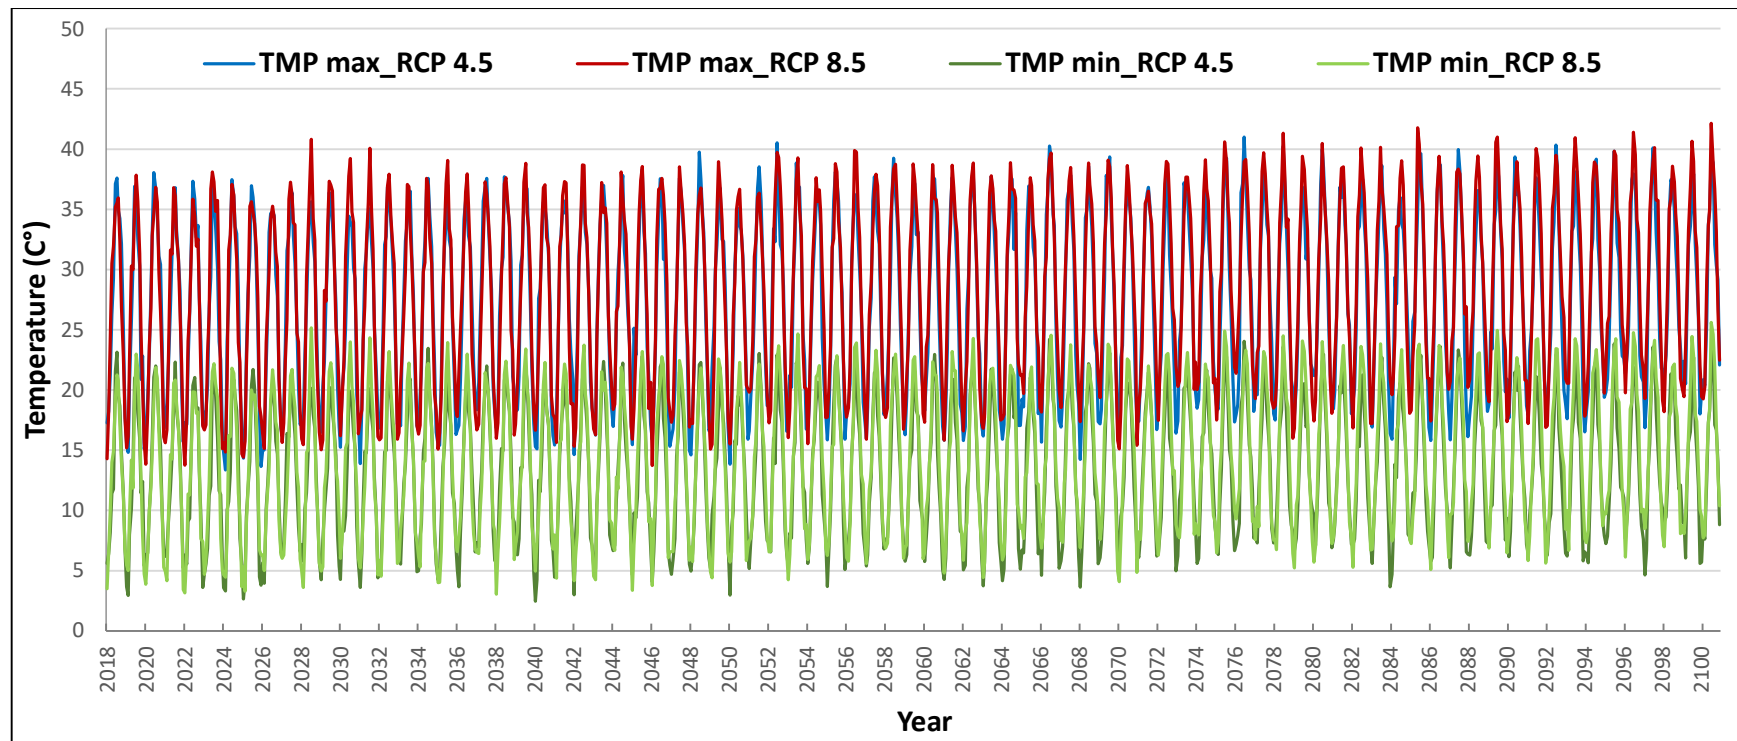

Figure S4: Future mean monthly maximum and minimum temperature scenarios using variance scaling bias correction.

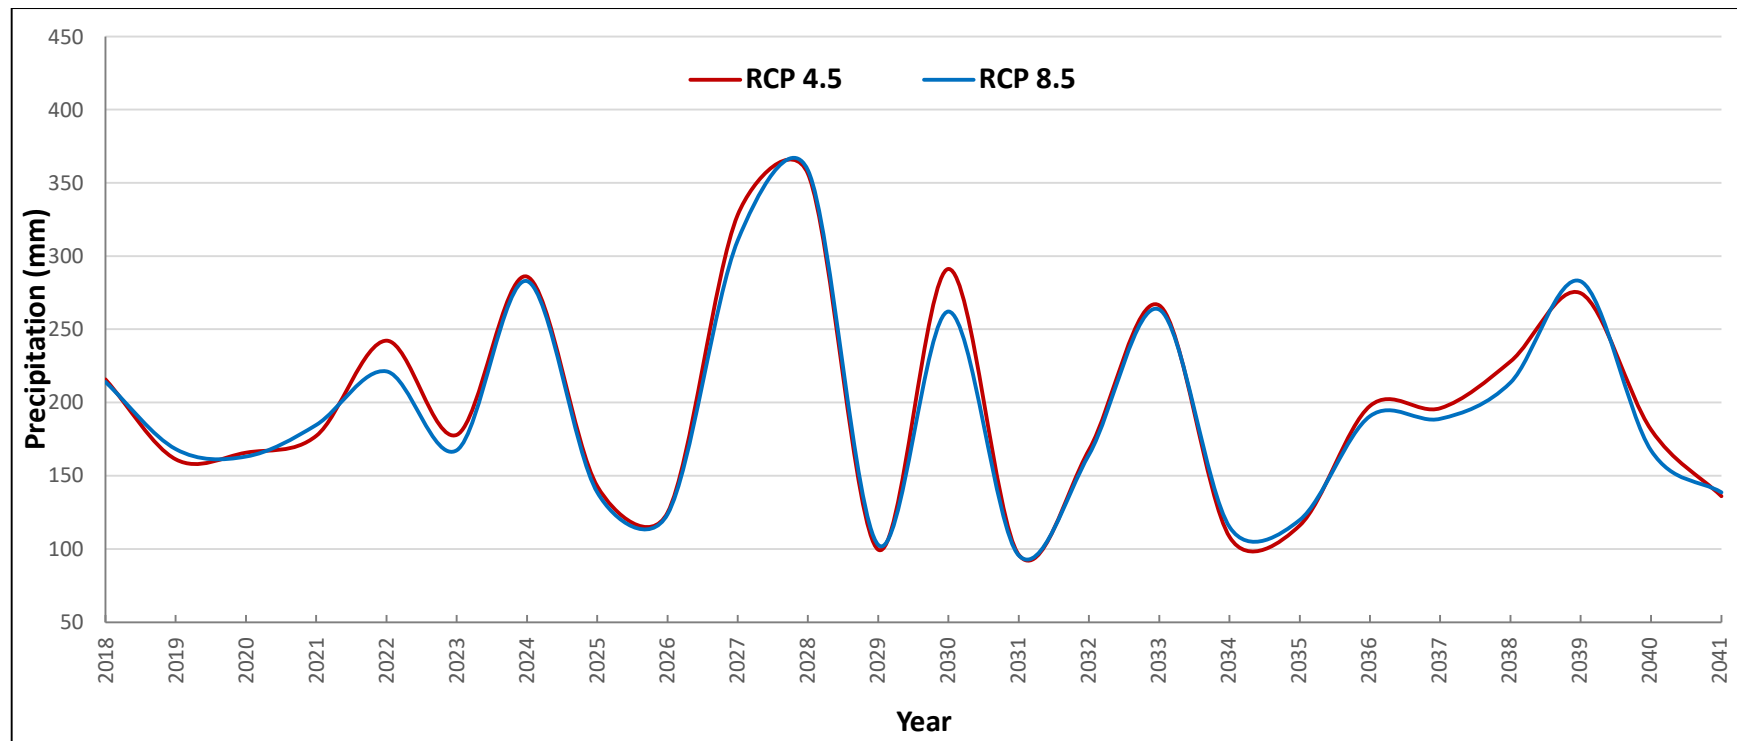

Figure S5: Future mean annual precipitation scenarios using delta-change bias correction.

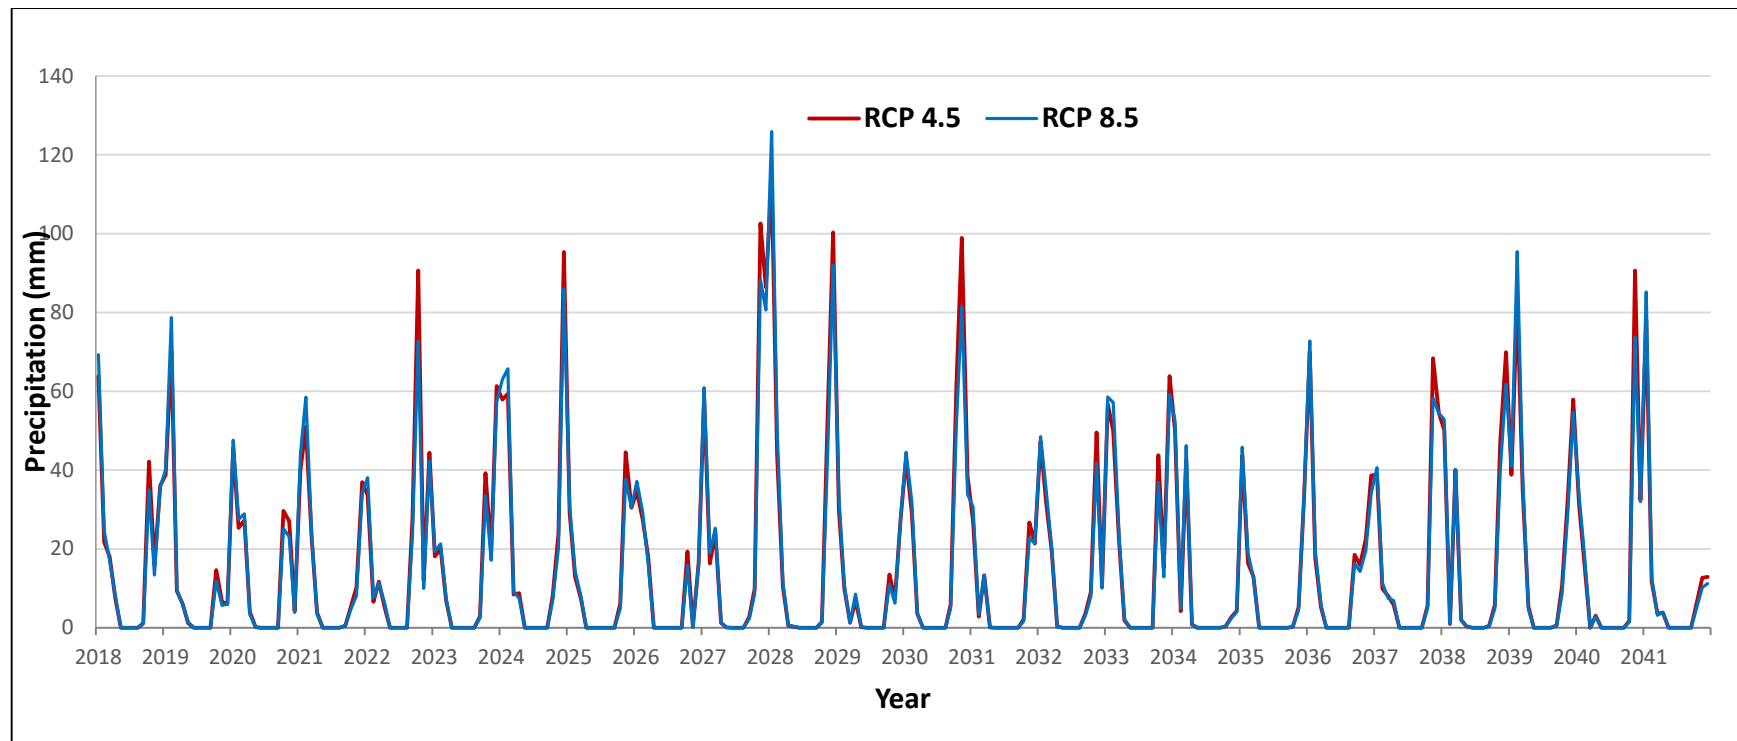

Figure S6: Future mean monthly precipitation scenarios using delta-change bias correction.

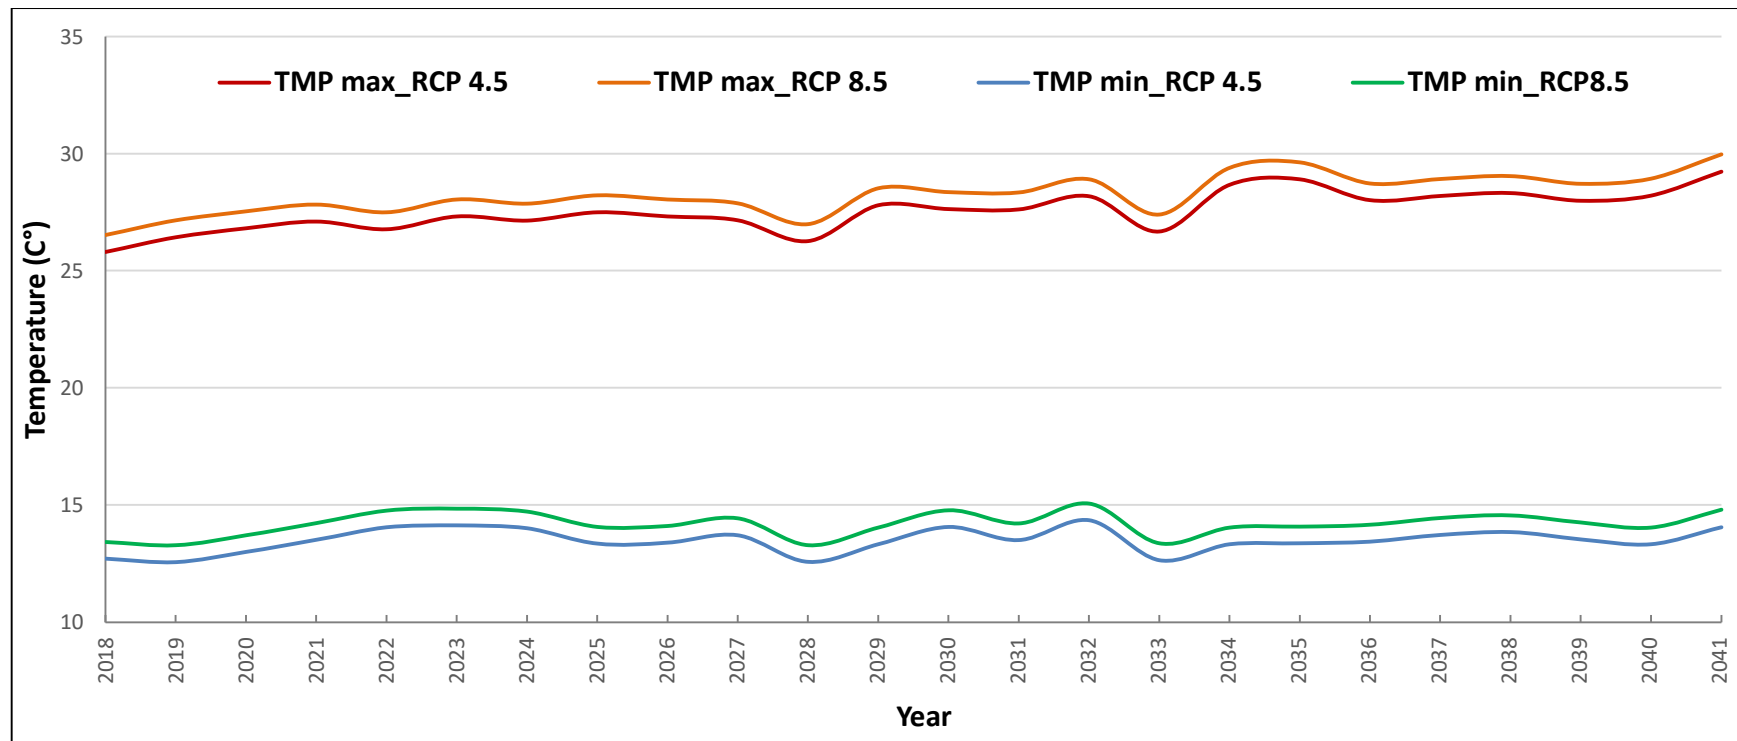

Figure S7: Future mean annual maximum and minimum temperature scenarios using delta-change bias correction.

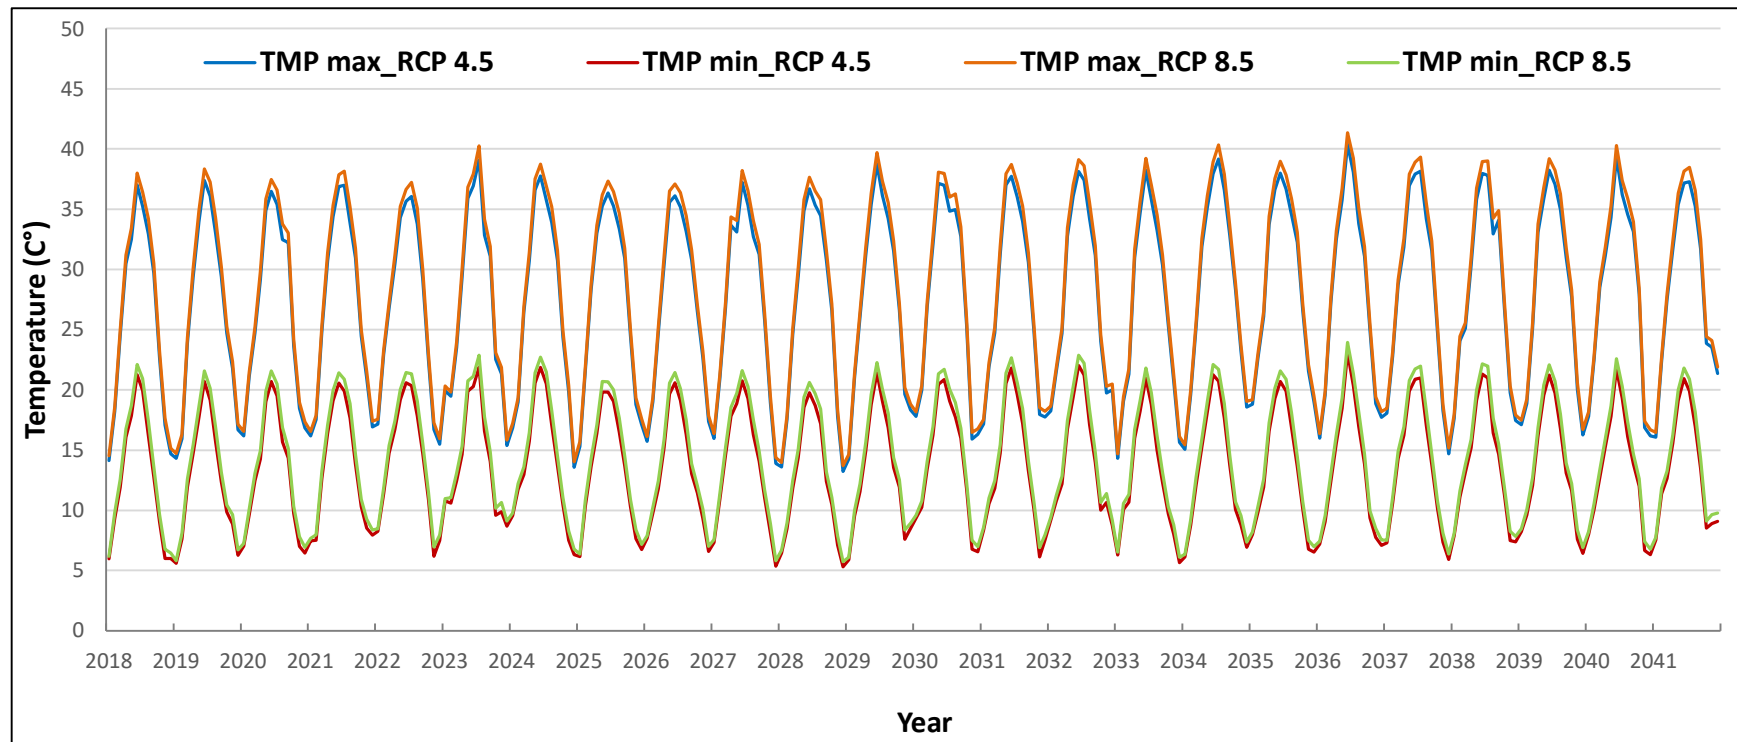

Figure S8: Future mean monthly maximum and minimum temperature scenarios using delta-change bias correction.
